# Supplementary material for: Fatty acid desaturase 2 determines the lipidomic landscape and steroidogenic function of the adrenal gland
Source: PubMed Central journal article supplement (PMC10361602; doi:10.1126/sciadv.adf6710), 2023-07-21
Supplement: sciadv.adf6710_sm.pdf [file sciadv.adf6710_sm.pdf]

Supplementary Materials for  
**Fatty acid desaturase 2 determines the lipidomic landscape and steroidogenic  
function of the adrenal gland**

Anke Witt *et al.*

Corresponding author: Vasileia Ismini Alexaki, [vasileiaIsmini.alexaki@uniklinikum-dresden.de](mailto:vasileiaIsmini.alexaki@uniklinikum-dresden.de)

*Sci. Adv.* **9**, eadf6710 (2023)  
DOI: 10.1126/sciadv.adf6710

**This PDF file includes:**

Tables S1 to S6  
Figs. S1 to S6

## Supplemental Tables

**Table S1. Lipidome composition of adrenal glands of LFD- and HFD-fed mice**

|            | <b>Storage lipids<br/>(% mean ± SD)</b> | <b>Non-storage lipids<br/>(% mean ± SD)</b> |
|------------|-----------------------------------------|---------------------------------------------|
| <b>LFD</b> | 86.98 ± 5.43                            | 13.02 ± 5.22                                |
| <b>HFD</b> | 90.12 ± 1.93                            | 9.87 ± 1.89                                 |

**Table S2. Lipid class abundance in adrenal glands of LFD- and HFD-fed mice**

| <b>pmol/μg protein<br/>(Aver ± SD)</b> | <b>LFD</b>        | <b>HFD</b>        | <b>Stat.</b> |
|----------------------------------------|-------------------|-------------------|--------------|
| <b>CE</b>                              | 246.59 ± 68.57    | 280.49 ± 41.86    | ns           |
| <b>Ceramides</b>                       | 0.86 ± 0.16       | 1.27 ± 0.35       | ns           |
| <b>Cholesterol</b>                     | 37.03 ± 5.65      | 37.12 ± 3.64      | ns           |
| <b>CL</b>                              | 1.35 ± 0.27       | 1.44 ± 0.31       | ns           |
| <b>DAG</b>                             | 12.84 ± 8.06      | 10.26 ± 3.26      | ns           |
| <b>HexCer</b>                          | 0.0781 ± 0.0186   | 0.0646 ± 0.0089   | ns           |
| <b>LPA</b>                             | 0.00430 ± 0.00398 | 0.00628 ± 0.00148 | ns           |
| <b>LPC</b>                             | 3.98 ± 1.25       | 3.49 ± 0.47       | ns           |
| <b>LPE</b>                             | 0.91 ± 0.2        | 0.84 ± 0.11       | ns           |
| <b>LPE O-</b>                          | 0.33 ± 0.12       | 0.28 ± 0.05       | ns           |
| <b>LPG</b>                             | 0.0171 ± 0.0053   | 0.0246 ± 0.0075   | ns           |
| <b>LPI</b>                             | 0.0876 ± 0.0123   | 0.1330 ± 0.0188   | ns           |
| <b>LPS</b>                             | 0.0287 ± 0.0139   | 0.0395 ± 0.0052   | ns           |
| <b>PA</b>                              | 0.0198 ± 0.0200   | 0.0304 ± 0.0149   | ns           |
| <b>PC</b>                              | 68.54 ± 6.82      | 70.56 ± 12.32     | ns           |
| <b>PC O-</b>                           | 2.07 ± 0.15       | 1.95 ± 0.27       | ns           |
| <b>PE</b>                              | 24.72 ± 5.09      | 29.84 ± 7.06      | ns           |
| <b>PE O-</b>                           | 18.23 ± 2.49      | 17.84 ± 1.65      | ns           |
| <b>PG</b>                              | 0.869 ± 0.067     | 0.766 ± 0.406     | ns           |
| <b>PI</b>                              | 12.15 ± 1.94      | 13.3 ± 2.76       | ns           |
| <b>PS</b>                              | 5.9 ± 0.49        | 5.73 ± 0.72       | ns           |
| <b>SM</b>                              | 5.29 ± 0.75       | 5.56 ± 0.75       | ns           |
| <b>TAG</b>                             | 1306.32 ± 767.16  | 1583.34 ± 338.58  | ns           |
| <b>Total</b>                           | 3496.45 ± 1473.05 | 4128.73 ± 698.88  | ns           |

ns: not significant

**Table S3. Double bond index (DBI) and length index (LI) in storage and non-storage lipids in the adrenal glands of LFD- and HFD-fed mice**

|            | STORAGE LIPIDS (Aver ± SD) |                  |         | NON-STORAGE LIPIDS (Aver ± SD) |                  |         |
|------------|----------------------------|------------------|---------|--------------------------------|------------------|---------|
|            | LFD                        | HFD              | P-value | LFD                            | HFD              | P-value |
| <b>DBI</b> | 2.809 +/- 0.095            | 3.072 +/- 0.024  | ***     | 3.322 +/- 0.049                | 3.462 +/- 0.042  | ***     |
| <b>LI</b>  | 45.291 +/- 4.203           | 47.537 +/- 1.223 | ns      | 36.828 +/- 0.081               | 37.110 +/- 0.064 | ***     |

\*\*\* <0.001; ns: not significant

**Table S4. Composition of diets used for feeding of *Fads2*<sup>-/-</sup> and WT mice**

| Fatty acid              | PUFA-rich diet      | Low-PUFA diet       |
|-------------------------|---------------------|---------------------|
| <b>Total sat.</b>       | <b>19.62 ± 0.03</b> | <b>47.39 ± 0.01</b> |
| <b>Total mono.</b>      | <b>28.16 ± 0.07</b> | <b>38.02 ± 0.03</b> |
| 18:2n-6                 | 42.02 ± 0.03        | 9.27 ± 0.01         |
| 18:3n-6                 | 0.02 ± 0.01         | ND                  |
| 20:2n-6                 | 0.08 ± 0.001        | ND                  |
| 20:3n-6                 | 0.02 ± 0.01         | ND                  |
| 20:4n-6                 | 0.13 ± 0.003        | ND                  |
| 22:2n-6                 | ND                  | ND                  |
| 22:4n-6                 | ND                  | ND                  |
| 22:5n-6                 | ND                  | ND                  |
| <b>Total ω6 FAs</b>     | <b>42.27 ± 0.03</b> | <b>9.27 ± 0.01</b>  |
| 18:3n-3                 | 3.88 ± 0.02         | 2.43 ± 0.003        |
| 20:3n-3                 | ND                  | ND                  |
| 20:5n-3                 | 1.49 ± 0.01         | ND                  |
| 22:5n-3                 | 0.25 ± 0.01         | ND                  |
| 22:6n-3                 | 1.32 ± 0.01         | ND                  |
| <b>Total ω3 FAs</b>     | <b>6.25 ± 0.02</b>  | <b>2.43 ± 0.003</b> |
| <b>Total FA (μg/mg)</b> | <b>47.00 ± 0.68</b> | <b>43.19 ± 1.15</b> |

( % of total fatty acids; Mean ± SEM; ND, not detected)

**Table S5. Lipidomics in adrenal glands of WT and *Fads2*<sup>-/-</sup> mice fed a PUFA-rich or low-PUFA diet**

| Lipid species          | Low-PUFA diet     |                                       |               | PUFA-rich diet    |                                       |                 |
|------------------------|-------------------|---------------------------------------|---------------|-------------------|---------------------------------------|-----------------|
|                        | WT (Aver±SD)      | <i>Fads2</i> <sup>-/-</sup> (Aver±SD) | P value       | WT (Aver±SD)      | <i>Fads2</i> <sup>-/-</sup> (Aver±SD) | P value         |
| <b>C14:1 n-5</b>       | 0.033333±0.08165  | 0.083333 ± 0.132916                   | 0.45057       | n.d.              | n.d.                                  | n.a.            |
| <b>C20:4 n-3 (ETA)</b> | 0.95±0.207364     | 0.5±0.089443                          | 0.00064 (***) | 0.983333±0.263944 | 1.466667±0.338625                     | 0.020215264 (*) |
| <b>C20:5 n-3 (EPA)</b> | 41.6±9.324591     | 21.23333±2.881435                     | 0.00046 (***) | 45.71667±6.546882 | 66.2±17.14211                         | 0.021037628 (*) |
| <b>C18:3 n-3 (ALA)</b> | 18.93333±6.712575 | 27.81667±12.06887                     | 0.14619       | 35.88333±24.94806 | 37.98333±6.767102                     | 0.846254490     |

|                              |                    |                    |                  |                   |                   |                  |
|------------------------------|--------------------|--------------------|------------------|-------------------|-------------------|------------------|
| <b>C18:3 n-6 (GLA)</b>       | 6.483333±1.483801  | 4.383333±2.964737  | 0.15181          | 10.35±5.29783     | 6.283333±2.11605  | 0.111377473      |
| <b>C14:0</b>                 | 99.383333±16.63171 | 81.333333±4.507623 | 0.02809 (*)      | 59.05±33.32559    | 73.66667±11.16739 | 0.332368186      |
| <b>C22:6 n-3 (DHA)</b>       | 1567.833±281.4653  | 765.5667±68.03622  | 0.00005 (****)   | 1911.067±374.2711 | 2059.133±373.6225 | 0.508415986      |
| <b>C16:1 n-7</b>             | 163.3167±29.67716  | 163.2±19.59153     | 0.993746         | 83.81667±44.24249 | 91.2±13.55389     | 0.7041063        |
| <b>C20:4 n-6 (ARA)</b>       | 7703.533±1051.61   | 1808.25±236.4437   | 0.0000001 (****) | 7843.15±1187.82   | 6571.517±769.2027 | 0.0523427        |
| <b>C18:2 n-6 (LA)</b>        | 650.3667±128.7274  | 1498.85±215.0335   | 0.000009 (****)  | 1208.883±386.0135 | 1592.8±208.8327   | 0.0577698        |
| <b>C22:5 n-3 (DPA)</b>       | 175.6±27.43545     | 118.75±16.53273    | 0.00145 (**)     | 126.9±30.69111    | 157.1167±32.01777 | 0.1261116        |
| <b>C22:5 n-6 (DPA)</b>       | 53.36667±7.226248  | 0.066667±0.163299  | 0.000000 (****)  | 16.18333±5.177419 | n.d.              | n.a.             |
| <b>C20:3</b>                 | 126.9667±18.00507  | 12.06667±5.333542  | 0.000000 (****)  | 155.1667±16.56365 | 31.21667±3.727421 | 0.0000000 (****) |
| <b>C16:0 (Palmitic acid)</b> | 1049.033±137.3459  | 1087.883±196.4046  | 0.699660         | 791.6833±295.7263 | 1176.983±237.1646 | 0.0320074 (*)    |
| <b>C18:1 n-9 cis (OA)</b>    | 1754±285.4089      | 2170.517±221.2694  | 0.0180016 (*)    | 1056.183±308.9346 | 1199.933±136.9281 | 0.3219459        |
| <b>C18:1 n-9 trans (EA)</b>  | 1887.533±276.9233  | 2223.267±222.4705  | 0.043129 (*)     | 1227.933±321.9364 | 1330.717±127.5553 | 0.48386794       |
| <b>C20:2 n-6 (DGLA)</b>      | 28.18333±4.257895  | 136.45±19.96034    | 0.0000001 (****) | 41.78333±6.146029 | 79.81667±19.75605 | 0.00113822 (**)  |
| <b>C18:0 (Stearic acid)</b>  | 693.7333±104.6519  | 657.9167±96.40173  | 0.55128          | 580.9833±141.9845 | 730.2833±127.7511 | 0.0845414        |
| <b>C20:1 n-9</b>             | 75.58333±15.21084  | 162.6±24.82402     | 0.000025 (****)  | 29.85±11.24736    | 40.66667±7.336939 | 0.0767587        |
| <b>C22:2 n-6</b>             | n.d.               | 0.9±0.745654       | n.a.             | n.d.              | 0.183333±0.213698 | n.a.             |
| <b>C22:1 n-9</b>             | 18.65±1.615859     | 34.36667±9.332452  | 0.002269 (**)    | n.d.              | 24.96667±5.699006 | n.a.             |
| <b>C22:0</b>                 | 254.65±112.2897    | 269.2167±129.8201  | 0.8394989        | 349.5167±219.8333 | 261.0667±112.668  | 0.40102768       |

\* <0.05, \*\* <0.01, \*\*\* <0.001, \*\*\*\* <0.0001; n.d.: not detected, n.a.: not applicable

**Table S6. List of primers**

|                    |                           |
|--------------------|---------------------------|
| <i>Cyp11a1_Fwd</i> | 5'GCTGAGTACTGGAAAGGGAGC3' |
| <i>Cyp11a1_Rev</i> | 5'TGCCAGCTTCTCCCTGTAA3'   |
| <i>Cyp11b1_Fwd</i> | 5'ATAGAGAACTCCGTGGCCTG3'  |
| <i>Cyp11b1_Rev</i> | 5'TGCAGTCGGTTGAAGTACCA3'  |

|                    |                            |
|--------------------|----------------------------|
| <i>Cyp11b2_Fwd</i> | 5'AGAATGGCGTCTCAACCGAC3'   |
| <i>Cyp11b2_Rev</i> | 5'AGTCCCTTGCTACCATGTCC3'   |
| <i>Cyp21a1_Fwd</i> | 5'GCTGTGGCTTTCCTGCTTCAC3'  |
| <i>Cyp21a1_Rev</i> | 5'GGCCCAGCTTGAGGTCTAACT3'  |
| <i>Fads2_Fwd</i>   | 5'TCCTCTCGTACTTCGGCACT3'   |
| <i>Fads2_Rev</i>   | 5'GGTTCACCAGTTGGCTGAG3'    |
| <i>3β-Hsd2_Fwd</i> | 5'AGGGAGCTCTCAATTGTGCC3'   |
| <i>3β-Hsd2_Rev</i> | 5'GCTTAGAAAGGCTGGTTCTGG3'  |
| <i>Star_Fwd</i>    | 5'CTGTCCACCACATTGACCTG3'   |
| <i>Star_Rev</i>    | 5'CAGCTATGCAGTGGGAGACA3'   |
| <i>Tbp_Fwd</i>     | 5'AGAACAATCCAGACTAGCAGCA3' |
| <i>Tbp_Rev</i>     | 5'GGGAAC TTCACATCACAGCTC3' |
| <i>Mm 18S Fwd</i>  | 5'GTTCCGACCATAAACGATGCC3'  |
| <i>Mm 18S Rev</i>  | 5'TGGTGGTGCCCTTCCGTCAAT3'  |
| <i>FADS2 Fwd</i>   | 5'CACGGCCTTTGTCCTTGCTA3'   |
| <i>FADS2 Rev</i>   | 5'AGATGTTAGGCTTGGCGTGG3'   |
| <i>STAR Fwd</i>    | 5'GGGAGTGGAACCCCAATGTC3'   |
| <i>STAR Rev</i>    | 5'CCAGCTCGTGAGTAATGAATGT3' |
| <i>Hs 18S Fwd</i>  | 5'TGCCCTATCAACTTTCGATG3'   |
| <i>Hs 18S Rev</i>  | 5'GATGTGGTAGCCGTTTCTCA3'   |

## Supplemental Figure legends

### Figure S1. FADS2 is required for steroidogenesis in adrenocortical cells

**A.** FADS2 protein expression in liver (Liv), adrenal glands (Adr), kidney (Kid), brain (Br) and gonadal adipose tissue (GAT) in two wild-type mice (WT1, WT2) assessed by western blot using  $\alpha$ -Tubulin as a loading control. Adrenal glands of *Fads2*<sup>-/-</sup> mice (KO<sub>adrenal</sub>) were used as negative control. **B.** PUFA synthesis pathway. **C.** Western blot of cell lysate fractions from NCI-H295R cells, separated by Optiprep density gradient. Same amount of protein from all fractions was blotted per lane. Representative blots are shown. Fractions 10-12 (SDHB positive) were identified as mitochondrial, fractions 4-5 (HSL positive) were identified as lipid droplets. **D.** Cholesterol and CE content in the lipid droplet fractions of NCI-H295R cells treated for 18 h with SC-26196 (10  $\mu$ M) or DMSO (Ctrl); results are shown as fold increase in SC-26196-treated compared to DMSO-treated cells. Results of one out of two experiments are shown. **E.** Cell viability of primary adrenal cells treated for 18 h with SC-26196 (10  $\mu$ M) or DMSO (n=4). **F.** NCI-H295R cells were treated with SC-26196 (10  $\mu$ M) or DMSO (Ctrl) for 18 h followed by 30 min or 24 h treatment with forskolin (FSK, 1  $\mu$ M), in presence of SC-26196 or DMSO. Steroids were measured in the cell culture supernatants by LC-MS/MS. **G.** Relative expression of *Star*, *Cyp11a1*, *3 $\beta$ -Hsd2*, *Cyp11b1* and *Cyp11b2* in primary adrenal cell cultures treated for 18 h with SC-26196 (10  $\mu$ M) or DMSO (Ctrl). *Tbp* expression was used as a housekeeping gene. Relative gene expression of DMSO-treated cells was set to 1 (n=11). **H.** FADS2 expression in NCI-H295R cells transfected for 24 h with a FADS2-overexpressing plasmid (pFADS2) or a control plasmid (pCMV); *18S* expression was used as a housekeeping gene (n=4). **I.** FADS2 expression in pFADS2- or pCMV-transfected NCI-H295R cells assessed by western blot (24 h post-transfection). Vinculin was used as a loading control. **J.** 11-Deoxycorticosterone, cortisol and aldosterone levels were measured by LC-MS/MS in cell culture supernatants of pFADS2- or pCMV-transfected NCI-H295R cells treated 24 h post-transfection for 24 h with forskolin (FSK, 1  $\mu$ M) (n=5-6). Data in **E-H** and **J** are shown as mean  $\pm$  SEM; \* p-value<0.05, \*\* p-value<0.01, \*\*\* p-value<0.001; \*\*\*\* p-value<0.0001

### Figure S2. Obesity-related changes in lipid composition and gene transcription in the adrenal gland

**A.** ACTH plasma levels in LFD and HFD mice (n=6-8). **B.** Adrenal gland weight in LFD and HFD mice (7-10). Data in **A** and **B** are shown as mean  $\pm$  SEM; \* p-value<0.05 **C.** FADS2 protein expression in liver and brain of LFD and HFD mice (n=5). Liver of *Fads2*<sup>-/-</sup> mice (KO<sub>liver</sub>) was used as negative control,  $\alpha$ -Tubulin was used as a loading control. **D.** Principal component analysis (PCA) performed on all lipids, non-storage and storage lipids in adrenal glands of mice fed for 20 weeks a LFD or HFD. **E-H.** Storage (CE, TAG) (**E**) and non-storage lipids (phospholipids, lysophospholipids and sphingolipids; cholesterol was excluded from the calculation) (**G**) in adrenal glands of mice fed a LFD or HFD were regrouped according to the number of carbon atoms of the acyl chains; only the length of groups with a mean abundance > 1 mol % are shown. Storage (**F**) and non-storage lipids (**H**) were regrouped according to the number of double bonds of their acyl chains. **I,J.** PC (**I**) and PE (**J**) lipid species in adrenal glands of lean and obese mice. Only the species

with a mean abundance > 1 mol % are shown. The mean mol %  $\pm$  standard deviation (SD) are shown, (n=7-8 mice per group); \* p-value<0.05; \*\* p-value<0.01; \*\*\* p-value<0.001. **K-P.** GSEA based on RNA-Seq in the adrenal cortex of mice fed for 20 weeks a LFD or HFD for genes involved in metabolism of lipids (**K**), mitochondrial biogenesis (**L**), respiratory electron transport (**M**), oxidative phosphorylation (**N**), citrate cycle (**O**) and fatty acid beta oxidation (**P**) (n=4 mice per group).

**Figure S3. FADS2 inhibition reduces corticosteroid levels in obese mice**

**A.** 11-Dehydrocorticosterone levels in hair of HFD mice 3 weeks after SC-26196 treatment start (n=8-10 mice per group). **B.** Glucose tolerance test in HFD mice performed at feeding week 14 (n=8-10 mice per group). Data are shown as mean  $\pm$  SEM; \*\* p-value<0.01.

**Figure S4. Diet supplementation with icosapent ethyl transcriptionally reprograms mitochondrial metabolism in the adrenal cortex and does not affect ACTH levels**

**A-C.** Body weight (**A**), glucose tolerance test (**B**) and insulin tolerance test (**C**) in mice receiving a LFD, a HFD or a HFD with icosapent ethyl (n=8 mice per group). **D-F.** GSEA based on RNA-Seq in the adrenal cortex of mice fed a HFD supplemented with icosapent ethyl versus mice fed a HFD without icosapent ethyl for genes related to respiratory electron transport (**D**), oxidative phosphorylation (**E**) and citrate cycle (**F**) (n=4 mice per group). **G.** ACTH measurement in plasma of mice fed a HFD containing or not icosapent ethyl (n=8 mice per group). Data in A-C and G are shown as mean  $\pm$  SEM.

**Figure S5. FADS2 deficiency does not affect adrenal gland size, ACTH levels or steroidogenic enzyme expression**

**A.** Hematoxylin and eosin staining in adrenal glands of WT and *Fads2*<sup>-/-</sup> mice kept under a PUFA-rich or a low-PUFA diet. Representative photos of one caption (out of 7-8) per adrenal gland of WT and *Fads2*<sup>-/-</sup> mice are shown (n=5 mice per group). Scale bar, 200  $\mu$ m **B.** ACTH measurement in plasma of WT and *Fads2*<sup>-/-</sup> mice fed a PUFA-rich or low-PUFA diet (n=6-9 mice per group). **C.** Relative *Cyp11a1*, *3 $\beta$ -Hsd2*, *Cyp11b1* and *Cyp11b2* expression in the adrenal glands of WT and *Fads2*<sup>-/-</sup> mice fed a PUFA-rich or low-PUFA diet. Gene expression was set as 1 in WT mice fed a low-PUFA diet. *Tbp* was used as housekeeping gene (n=3 mice per group). **D.** Representative electron microscopy images of adrenocortical cells of WT and *Fads2*<sup>-/-</sup> mice fed a PUFA-rich or low-PUFA diet (magnification 1,200x). Adrenal glands of two WT and two *Fads2*<sup>-/-</sup> mice fed a low-PUFA and one WT and one *Fads2*<sup>-/-</sup> mice fed a PUFA-rich diet were examined. Asterisks (\*) depict lipid droplets. Scale bar, 1  $\mu$ m Data in **B** and **C** are shown as mean  $\pm$  SEM.

**Figure S6. FADS2 expression correlates with expression of steroidogenic genes in the human adrenal gland**

**A-G.** Correlation of *FADS2* expression with the expression of *STAR* (**A**), *VDAC1* (**B**), *CYP11A1* (**C**), *SF-1* (**D**) and *PRKACA* (**E**) in the human adrenal gland (**A-E**) and with the expression *SF-1* (**F**) and *PRKACA* (**G**)

in adrenocortical carcinoma (**F,G**), based on data from the public GEPIA2 database (<http://gepia2.cancer-pku.cn/#index>).



A

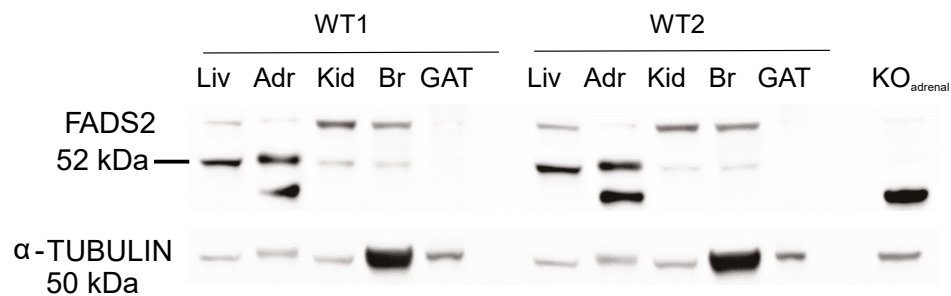

B

## omega-6 PUFA

## omega-3 PUFA

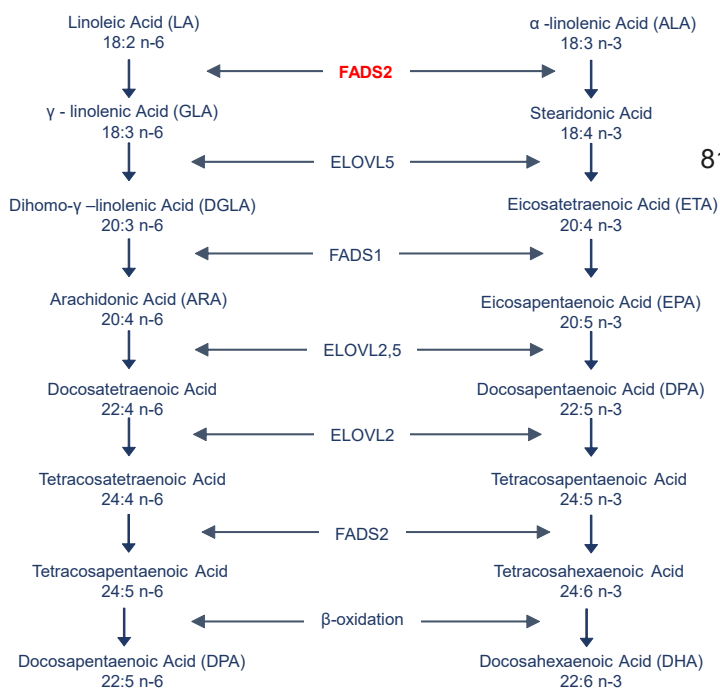

C

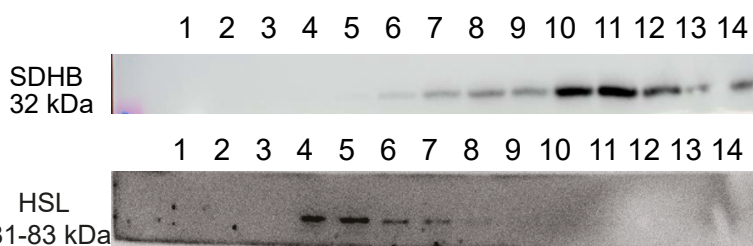

D

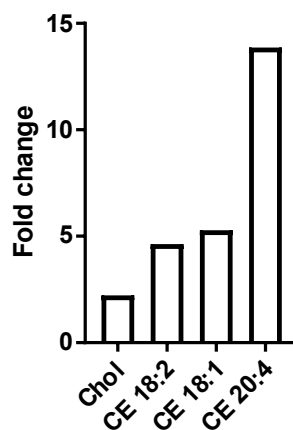

E

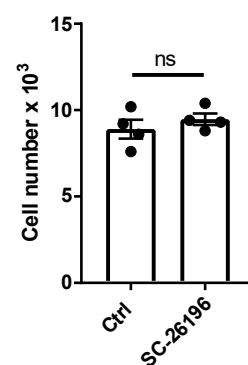

F

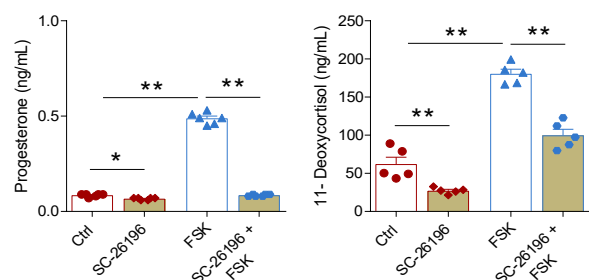

G

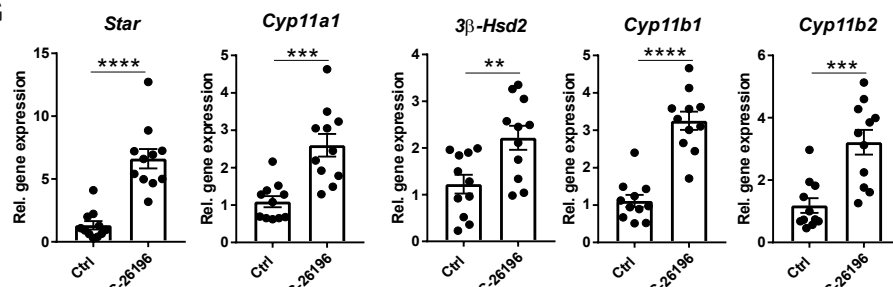

H

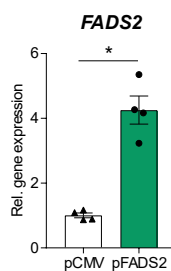

I

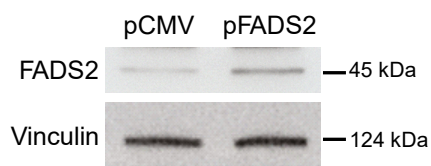

J

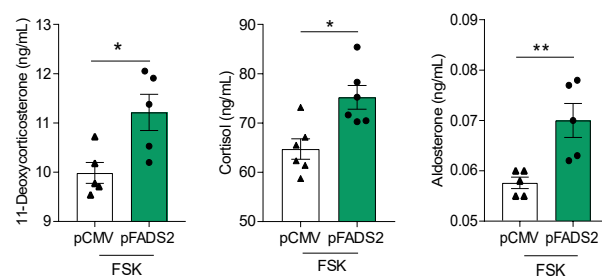

Figure S1

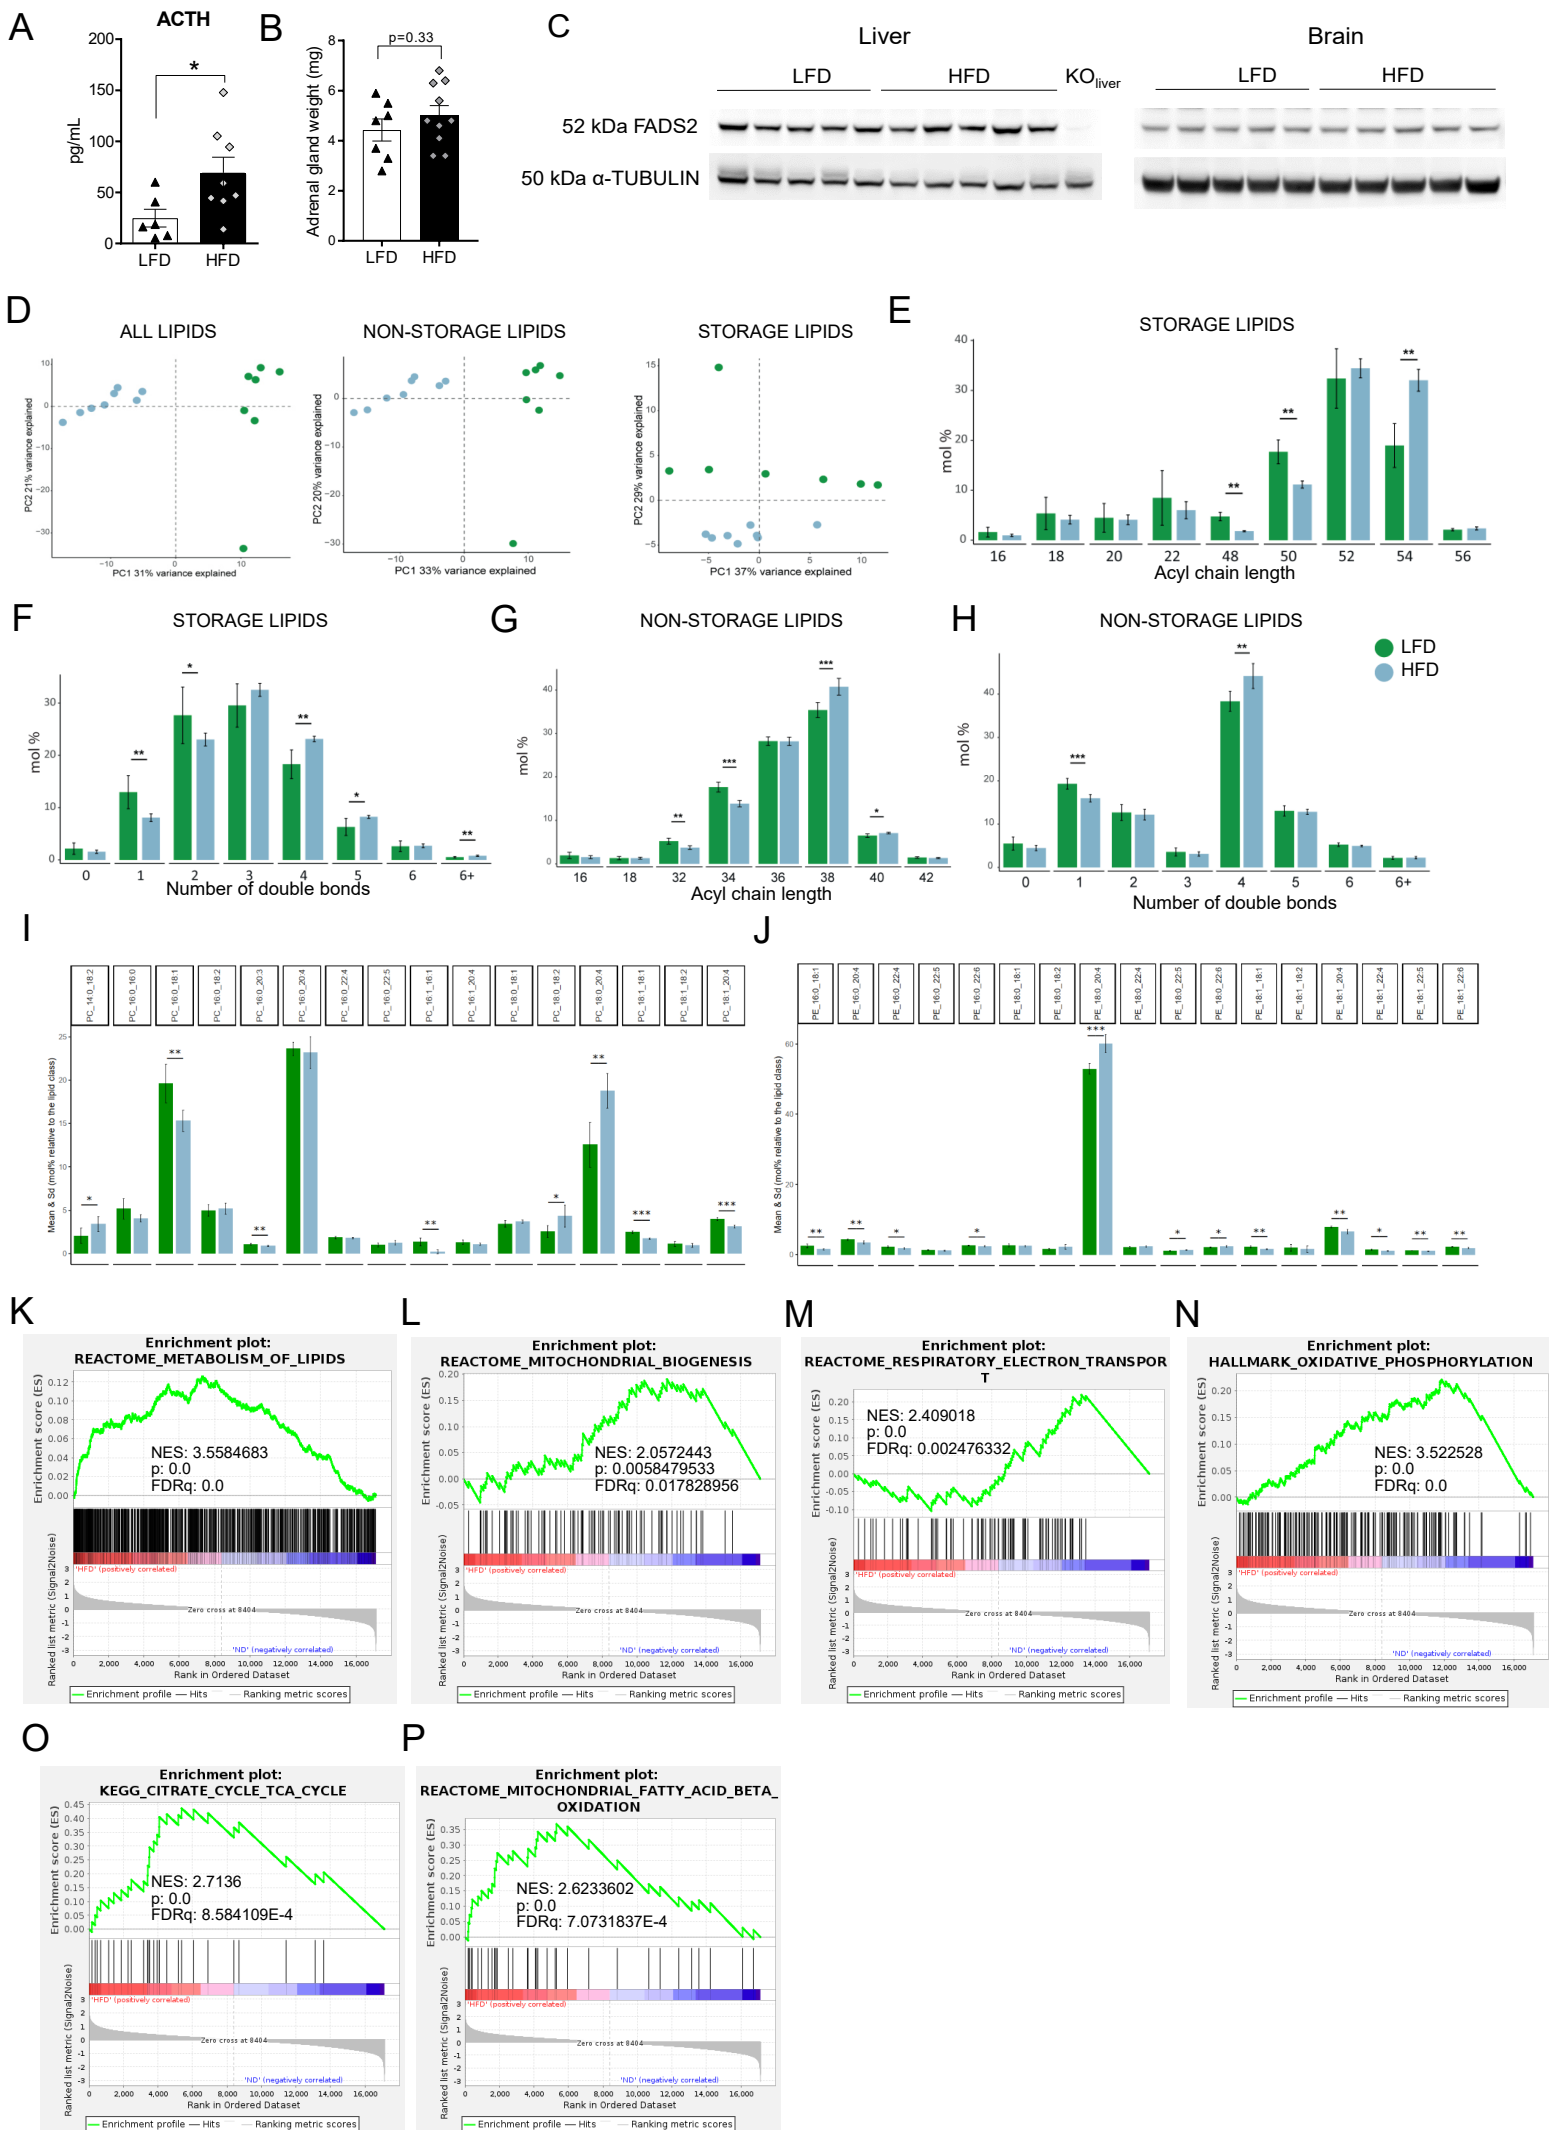

Figure S2

A

**11-Dehydrocorticosterone**

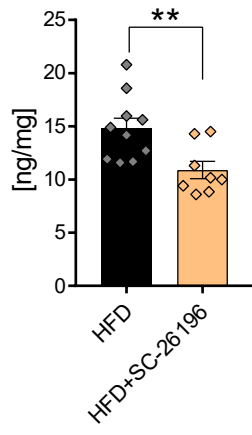

B

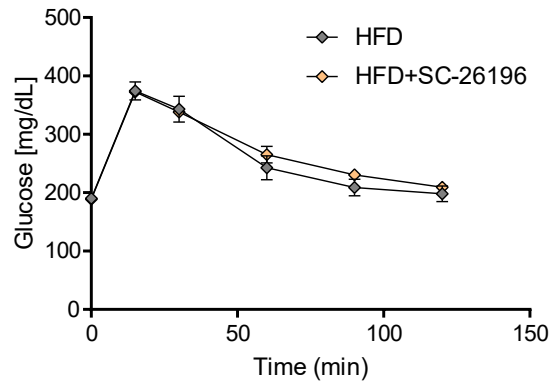

Figure S3

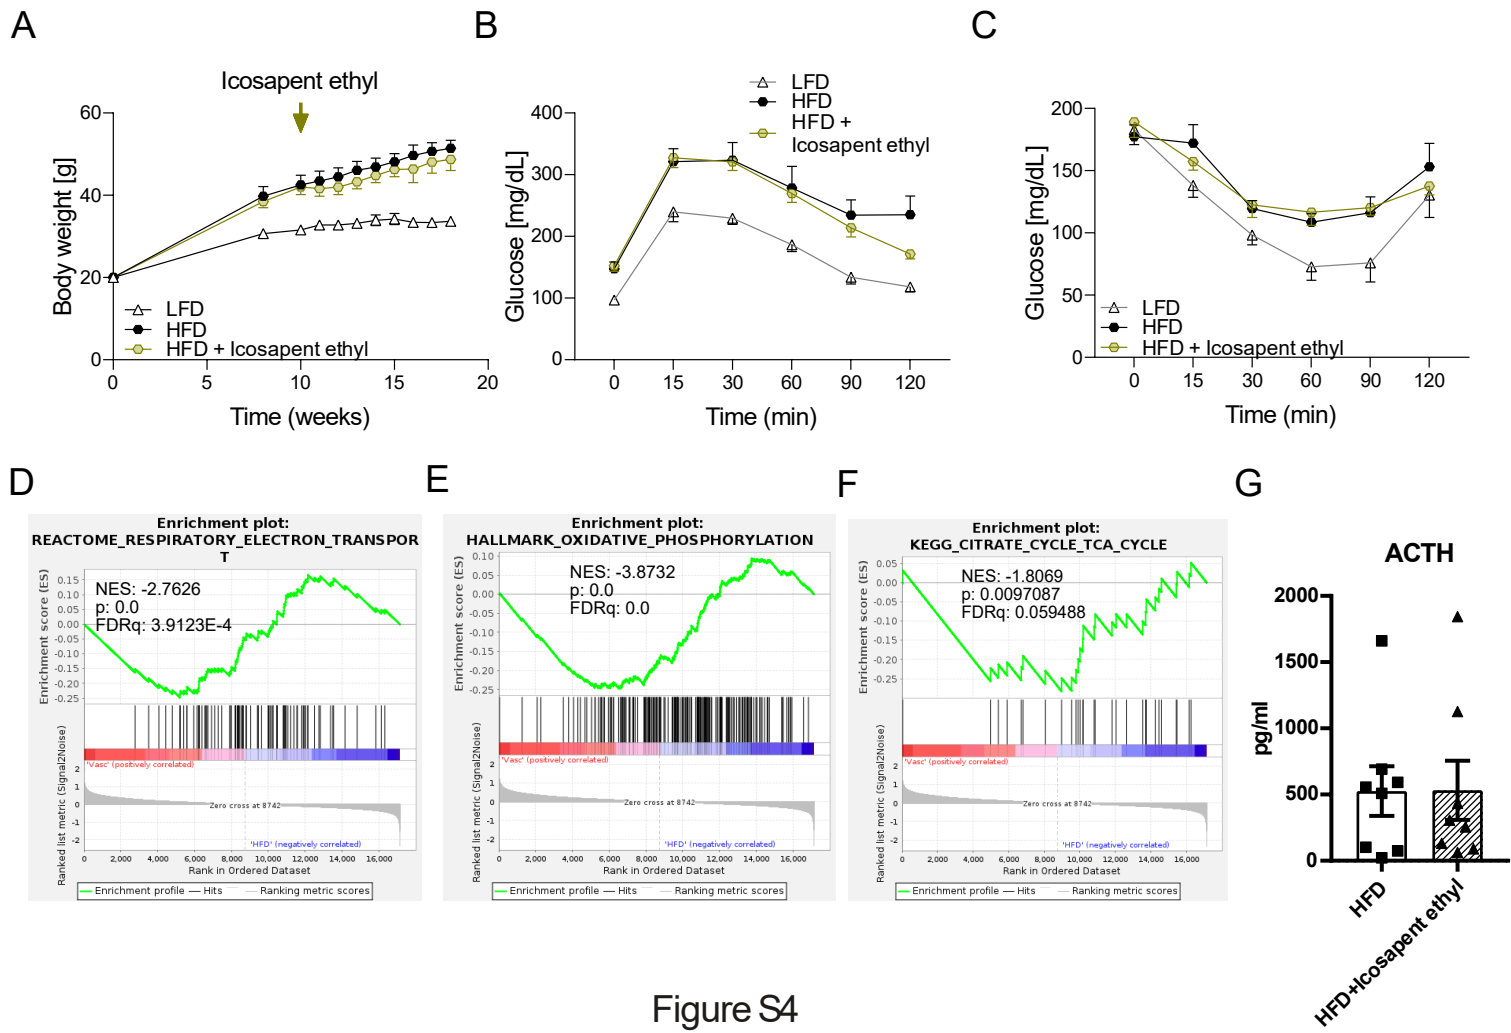

Figure S4

**A**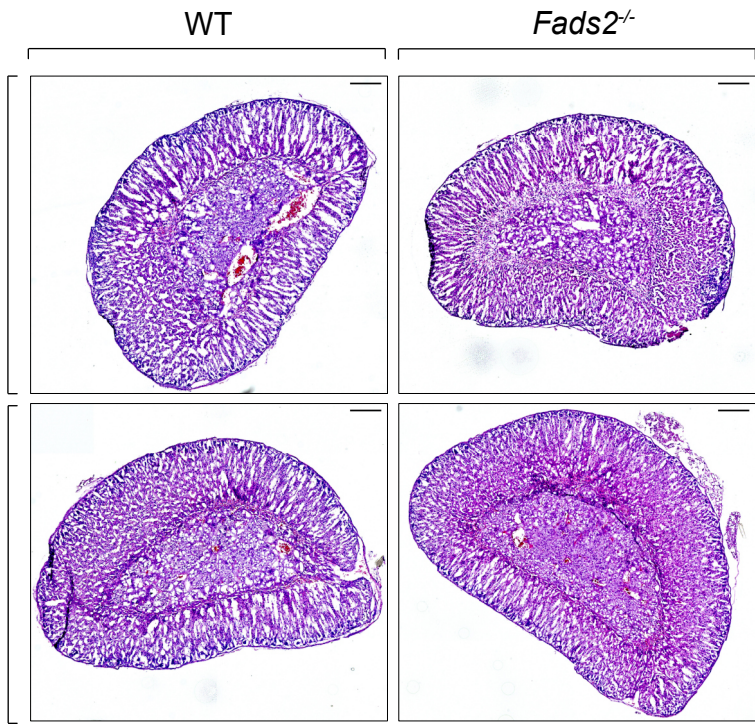**B**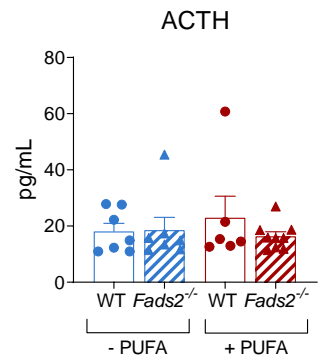**C**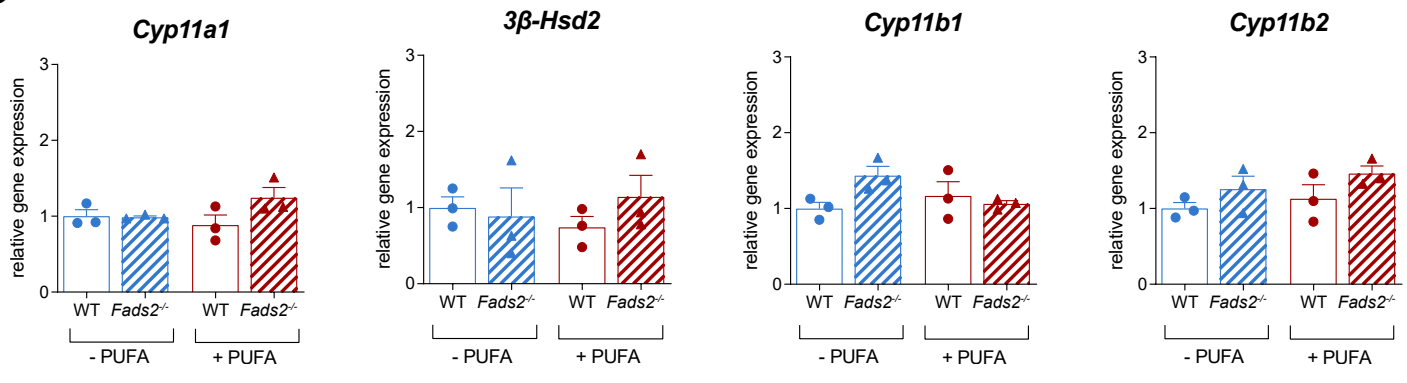**D**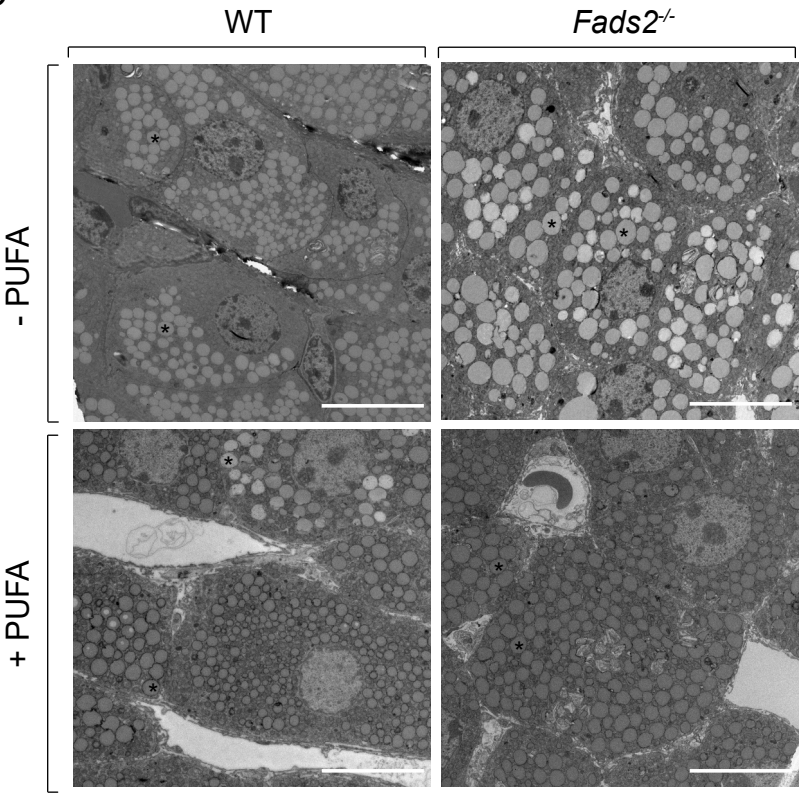

Figure S5

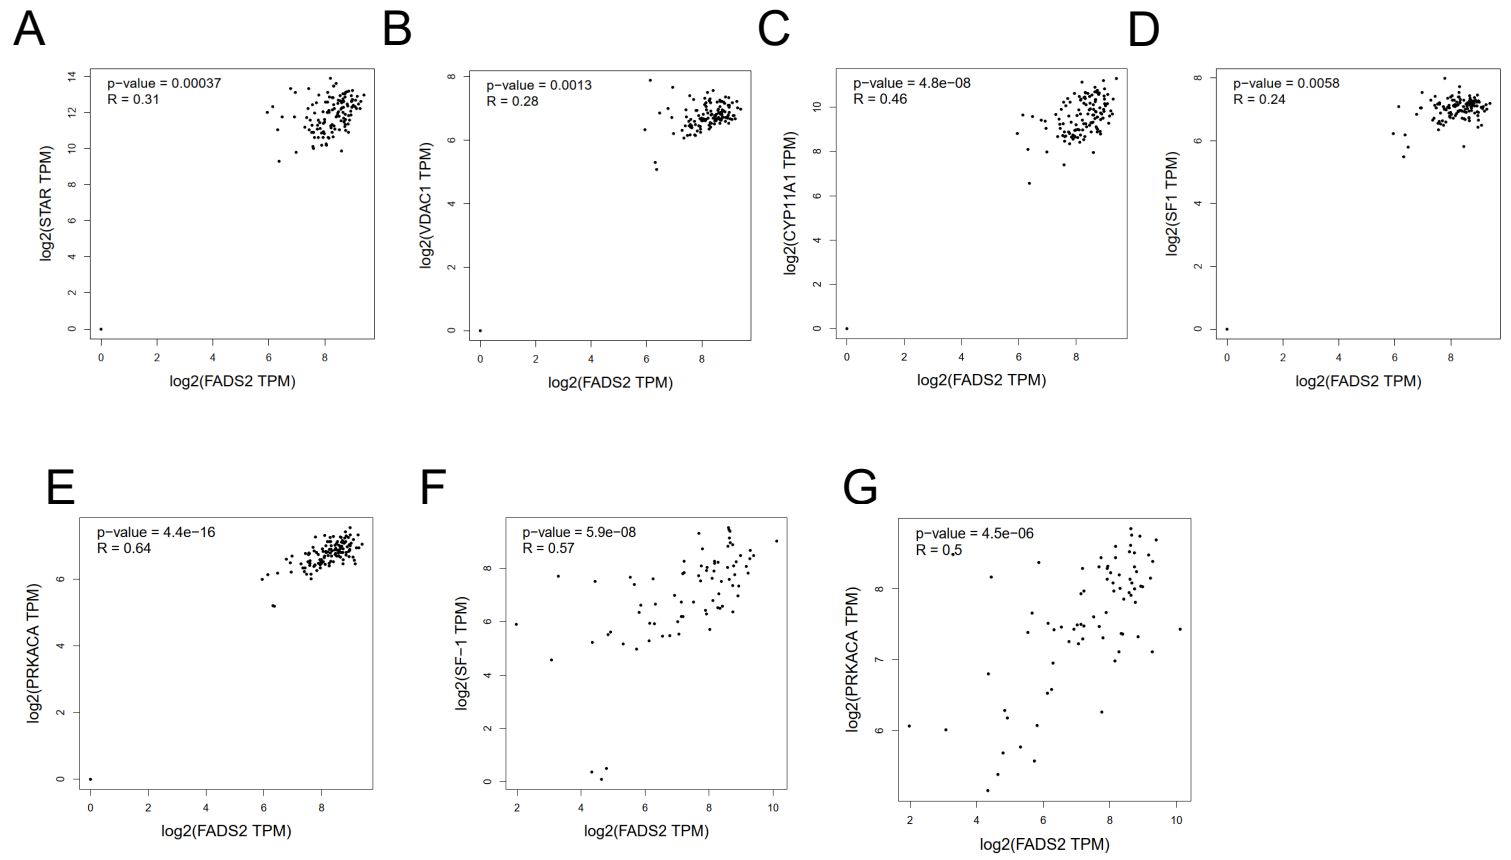

Figure S6
